# Supplementary material
Source: HighWire-hosted journal article supplement (https://genome.cshlp.org/content/suppl/2004/08/12/14.9.1812)
Supplement: Figure3_supplemental_Figure_Legend.pdf [file Figure3_supplemental_Figure_Legend.pdf]

**Figure 3 (supplemental)** Correlation of recombination rates with SNP variation. The x-axis shows the pseudomolecule position in which each tick-mark is a megabase. The left y-axis shows the centimorgan positions of genetic markers (black dots) from an *indica-japonica* cross (see text). The right y-axis shows the number of SNPs (solid blue line) per 100 Kbp of total DNA after subtraction of masked DNA.
